# Supplementary material for: Characterization of the Microbiome at the World’s Largest Potable Water Reuse Facility
Source: Front Microbiol. 2018 Oct 26;9:2435. doi: 10.3389/fmicb.2018.02435 (PMC6212505; doi:10.3389/fmicb.2018.02435)
Supplement: Supplementary file 2 [file Table_2.XLSX]

## Sheet: Fungi
Name	Q1 (2016)	Q1 (2017, cDNA)	Q1 (2017)	MFF	MFF (cDNA)	MF	MF (cDNA)	MFE	RO	RO (cDNA)	tax_id	lineage
Apiotrichum domesticum	0	0	0	0	0	0.07295	0	0	0	0	82514	k__Fungi (4751);p__Basidiomycota (5204);c__Tremellomycetes (155616);o__Trichosporonales (1851469);f__Trichosporonaceae (1759442);g__Apiotrichum (105983);s__Apiotrichum domesticum (82514);t__Apiotrichum domesticum (82514)
Apiotrichum montevideense	0	0	0	0	0	0.04058	0	0	0	0	82521	k__Fungi (4751);p__Basidiomycota (5204);c__Tremellomycetes (155616);o__Trichosporonales (1851469);f__Trichosporonaceae (1759442);g__Apiotrichum (105983);s__Apiotrichum montevideense (82521);t__Apiotrichum montevideense (82521)
Clavaria fumosa	0.03961	0.00812	0.04291	0.04479	0.04468	0.03842	0	0	0.27474	0.17895	264083	k__Fungi (4751);p__Basidiomycota (5204);c__Agaricomycetes (155619);o__Agaricales (5338);f__Clavariaceae (40105);g__Clavaria (104242);s__Clavaria fumosa (264083);t__Clavaria fumosa_u_t (264083)
Enterocytozoon bieneusi H348	0.00402	0	0	0	0.00347	0	0.00864	0	0.04715	0	481877	k__Fungi (4751);p__Microsporidia (6029);c__Microsporidia_u_c (6029);o__Apansporoblastina (6032);f__Enterocytozoonidae (27970);g__Enterocytozoon (27971);s__Enterocytozoon bieneusi (31281);t__Enterocytozoon bieneusi H348 (481877)
Epichloe sylvatica	0.21763	0.01308	0.13382	0.1862	0.17769	0.36388	0.39185	0	0.03242	0	79593	k__Fungi (4751);p__Ascomycota (4890);c__Sordariomycetes (147550);o__Hypocreales (5125);f__Clavicipitaceae (34397);g__Epichloe (5112);s__Epichloe sylvatica (79593);t__Epichloe sylvatica (79593)
Lentinus polychrous BCC7694	0.14847	0.00808	0.14399	0.1572	0.15236	0.14704	0.20222	0.64972	0.08342	0.05755	292559	k__Fungi (4751);p__Basidiomycota (5204);c__Agaricomycetes (155619);o__Polyporales (5303);f__Lentinaceae (83234);g__Lentinus (5357);s__Lentinus polychrous (292559);t__Lentinus polychrous (292559)
Malassezia restricta CBS 7877	0	0	0	0	0	0	0	0	0	0.04568	425264	k__Fungi (4751);p__Basidiomycota (5204);c__Malasseziomycetes (1538075);o__Malasseziales (162474);f__Malasseziaceae (742845);g__Malassezia (55193);s__Malassezia restricta (76775);t__Malassezia restricta CBS 7877 (425264)
Melampsora pinitorqua Mpini7	0.05537	0.00962	0.04935	0.04544	0.04673	0.02014	0.02749	0.21019	0.24676	0.23934	1298852	k__Fungi (4751);p__Basidiomycota (5204);c__Pucciniomycetes (162484);o__Pucciniales (5258);f__Melampsoraceae (5259);g__Melampsora (5260);s__Melampsora pinitorqua (526925);t__Melampsora pinitorqua Mpini7 (1298852)
Mortierella 1788 Branch	0	0.00867	0	0	0	0	0	0	0	0	4855	k__Fungi (4751);p__Mucoromycota (1913637);c__Mucoromycota_u_c (1913637);o__Mortierellales (214503);f__Mortierellaceae (4854);g__Mortierella (4855);s__Mortierella_u_s (4855);t__Mortierella_u_t (4855)
Mucor ramosissimus 97 1192	0	0.00149	0	0	0	0	0	0	0	0	64495	k__Fungi (4751);p__Mucoromycota (1913637);c__Mucoromycota_u_c (1913637);o__Mucorales (4827);f__Rhizopodaceae (1344955);g__Rhizopus (4842);s__Rhizopus oryzae (64495);t__Rhizopus oryzae (64495)
Neosartorya fischeri NRRL 181	0	0	0	0	0	0	0	0	0.07063	0.04514	331117	k__Fungi (4751);p__Ascomycota (4890);c__Eurotiomycetes (147545);o__Eurotiales (5042);f__Aspergillaceae (1131492);g__Aspergillus (5052);s__Aspergillus fischeri (36630);t__Aspergillus fischeri NRRL 181 (331117)
Puccinia arachidis	0.06361	0.00853	0.0637	0.0952	0.08548	0.11005	0.0446	0	0.06739	0.05656	333523	k__Fungi (4751);p__Basidiomycota (5204);c__Pucciniomycetes (162484);o__Pucciniales (5258);f__Pucciniaceae (5262);g__Puccinia (5296);s__Puccinia arachidis (333523);t__Puccinia arachidis (333523)
Saccharomyces cerevisiae M22	0	0.00138	0	0	0	0	0	0	0	0	538975	k__Fungi (4751);p__Ascomycota (4890);c__Saccharomycetes (4891);o__Saccharomycetales (4892);f__Saccharomycetaceae (4893);g__Saccharomyces (4930);s__Saccharomyces cerevisiae (4932);t__Saccharomyces cerevisiae M22 (538975)
Tilletia caries	0.01458	0	0	0	0	0	0	0	0	0	13290	k__Fungi (4751);p__Basidiomycota (5204);c__Exobasidiomycetes (452283);o__Tilletiales (62916);f__Tilletiaceae (5279);g__Tilletia (13289);s__Tilletia caries (13290);t__Tilletia caries (13290)
others 266 1949 Branch	0	0.12517	0	0	0	0	0	0	0	0	33183	k__Fungi (4751);p__Ascomycota (4890);c__Eurotiomycetes (147545);o__Onygenales (33183);f__Onygenales_u_f (33183);g__Onygenales_u_g (33183);s__Onygenales_u_s (33183);t__Onygenales_u_t (33183)
others 497 1989 Branch	0.16895	0.81586	0.32009	0.20595	0.21266	0	0.06733	0	0	0	5351	k__Fungi (4751);p__Basidiomycota (5204);c__Agaricomycetes (155619);o__Agaricales (5338);f__Tricholomataceae (5351);g__Tricholomataceae_u_g (5351);s__Tricholomataceae_u_s (5351);t__Tricholomataceae_u_t (5351)
others 532 1951 Branch	0.28778	0	0.24613	0.26523	0.27694	0.20694	0.25786	0.14009	0.1775	0.37678	33183	k__Fungi (4751);p__Ascomycota (4890);c__Eurotiomycetes (147545);o__Onygenales (33183);f__Onygenales_u_f (33183);g__Onygenales_u_g (33183);s__Onygenales_u_s (33183);t__Onygenales_u_t (33183)

## Sheet: ARGs
Name	Q1 (2016)	Q1 (2017, cDNA)	Q1 (2017)	MFF	MFF (cDNA)	MF	MF (cDNA)	MFE	RO	RO (cDNA)
Aminoglycoside 2024 Branch	0	0	0.12138	0	0	0.04355	0.01587	0	0.05184	0
Aminoglycoside a 2312 Branch	0.0139	0.01907	0.01679	0.03067	0.01815	0.01739	0.01138	0	0	0
Aminoglycoside a 2393 Branch	0	0	0	0	0	0	0.00206	0	0	0
Aminoglycoside aac2' Ib	0	0	0	0	0	0.00332	0	0	0	0
Aminoglycoside aac3 II 2030 Branch	0	0	0	0	0.00236	0	0	0	0	0
Aminoglycoside aac3 IId	0.00183	0	0	0	0	0	0	0	0	0
Aminoglycoside aac6' Ib	0.00301	0.00486	0.00566	0	0	0.00851	0	0	0	0
Aminoglycoside aac6'Ib cr	0.00226	0	0	0	0	0	0	0	0	0
Aminoglycoside aacA4	0.00548	0.00457	0	0.01044	0.00577	0.01023	0.0038	0	0	0
Aminoglycoside aadA 2142 Branch	0	0	0.00784	0	0.02029	0	0	0	0	0
Aminoglycoside aadA 2143 Branch	0.01046	0.00677	0	0.01028	0	0.01798	0.00551	0	0	0
Aminoglycoside aadA 2151 Branch	0	0	0	0	0	0.03007	0	0	0	0
Aminoglycoside aadA 2324 Branch	0	0	0	0	0	0	0.00796	0	0	0
Aminoglycoside aadA1	0.00851	0.00585	0.00725	0.00998	0.01061	0	0	0	0	0
Aminoglycoside aadA10	0.00833	0.00654	0.00563	0.01747	0.01165	0.01669	0.00687	0	0	0
Aminoglycoside aadA13	0.00346	0	0.00451	0	0.00225	0	0	0	0	0
Aminoglycoside aadA5	0.00214	0.00599	0.00836	0.00791	0.00459	0	0	0	0	0
Aminoglycoside aadA6	0.023	0.02875	0.02774	0.0381	0.03666	0	0.01439	0	0	0
Aminoglycoside aadA7	0.00605	0.00405	0	0.01222	0.00641	0.0082	0	0	0	0
Aminoglycoside ant2'' Ia	0.0217	0.02742	0.0257	0.03875	0	0	0.007	0	0	0
Aminoglycoside ant6 Ib	0.00569	0	0	0	0	0	0	0	0	0
Aminoglycoside ant9 Ia	0	0	0	0	0	0	0.00239	0	0	0
Aminoglycoside aph 2123 Branch	0	0	0	0.00735	0	0	0	0	0	0
Aminoglycoside aph2'' I 2469 Branch	0	0	0	0	0	0	0.00552	0	0	0
Aminoglycoside aph3' III	0	0.00275	0	0	0.00295	0.00805	0.00213	0	0	0
Aminoglycoside aph3' Ic	0	0.01353	0.01143	0.00625	0.00681	0	0	0	0	0
Aminoglycoside aph3'' Ib	0.0178	0.04203	0	0.04304	0.04405	0	0	0	0	0
Aminoglycoside aph6 Id	0.02856	0.07796	0.06976	0.06523	0.06155	0.02777	0.00985	0	0	0
Aminoglycoside sat 2182 Branch	0	0	0	0.00289	0	0	0	0	0	0
Aminoglycoside sat 2A	0.00167	0	0	0.00304	0.00283	0	0	0	0	0
Aminoglycoside strA	0.01129	0	0	0	0	0	0	0	0	0
Bacitracin-resistance bacA	0	0	0	0	0	0.00644	0.00721	0	0	0
Beta-lactam amp 2082 Branch	0.00657	0.00448	0	0	0.00428	0	0	0	0	0
Beta-lactam ampH	0	0	0	0.0035	0	0	0	0	0	0
Beta-lactam cfxA 2366 Branch	0	0.00809	0	0	0	0.01201	0	0	0	0
Beta-lactam cfxA 2367 Branch	0.00938	0	0.00631	0.01299	0.00801	0	0.01648	0	0	0
Beta-lactam cfxA3	0.00467	0	0.0043	0	0	0	0	0	0	0
Beta-lactam cfxA4	0	0	0	0.00677	0	0	0	0	0	0
Beta-lactam cfxA5	0	0	0	0	0.00418	0	0	0	0	0
Beta-lactam cfxA6	0.00265	0.00231	0.0031	0	0.0023	0	0.00579	0	0	0
Beta-lactam cphA 2511 Branch	0	0	0.00571	0	0	0	0	0	0	0
Beta-lactam pbp2 Ecoli	0	0.00371	0	0.00475	0.00418	0.00779	0.00572	0	0	0
Beta-lactam pbp4 Ecoli	0	0.00225	0	0	0.00253	0	0	0	0	0
Beta-lactam-resistance bla 140 560 1365 Branch	0	0	0	0	0	0	0	0	0.08523	0
Beta-lactam-resistance bla 42 1148 768 Branch	0	0	0	0	0.00211	0	0	0	0	0
Beta-lactam-resistance bla 751 1813 134 Branch	0	0	0.00195	0	0	0	0	0	0	0
Beta-lactam-resistance blaACT 51 Branch	0	0	0	0.0026	0	0	0	0	0	0
Beta-lactam-resistance blaAER 1	0.00294	0	0	0	0	0	0	0	0	0
Beta-lactam-resistance blaAIM 1	0	0.00201	0	0	0.00355	0	0	0	0	0
Beta-lactam-resistance blaAmpH	0	0	0	0.00327	0	0	0	0	0	0
Beta-lactam-resistance blaB 77 Branch	0	0.00227	0	0	0	0.01549	0	0	0	0
Beta-lactam-resistance blaB 78 Branch	0	0	0	0	0	0	0.00636	0	0	0
Beta-lactam-resistance blaCARB 1783 Branch	0	0.00183	0	0	0	0	0	0	0	0
Beta-lactam-resistance blaCME 1	0	0	0	0	0	0	0.00359	0	0	0
Beta-lactam-resistance blaCMY 110	0	0.00126	0	0	0	0	0	0	0	0
Beta-lactam-resistance blaCMY 1830 Branch	0.00266	0	0	0	0	0	0	0	0	0
Beta-lactam-resistance blaCMY 1877 Branch	0	0	0	0	0	0	0	0	0.27119	0
Beta-lactam-resistance blaCMY 82	0	0	0	0	0	0	0	0	0	0.23789
Beta-lactam-resistance blaGES 1676 Branch	0	0	0	0	0	0.00885	0	0	0	0
Beta-lactam-resistance blaGES 1678 Branch	0.00862	0.01125	0.02086	0.01773	0	0	0.00577	0	0	0
Beta-lactam-resistance blaGES 1679 Branch	0	0	0	0	0.01423	0	0	0	0	0
Beta-lactam-resistance blaGOB 5	0	0	0	0	0	0	0.00988	0	0	0
Beta-lactam-resistance blaGOB 713 Branch	0	0	0	0	0.00569	0	0	0	0	0
Beta-lactam-resistance blaGOB 714 Branch	0	0	0	0.00387	0	0.00809	0	0	0	0
Beta-lactam-resistance blaGOB 723 Branch	0	0	0	0	0	0	0.01045	0	0	0
Beta-lactam-resistance blaIMP 18	0.00721	0.02101	0.02139	0.01002	0.00892	0	0.00882	0	0	0
Beta-lactam-resistance blaKPC 1795 Branch	0	0.01102	0.0035	0.01015	0	0	0	0	0	0
Beta-lactam-resistance blaKPC 1796 Branch	0.00462	0	0	0	0	0.0094	0	0	0	0
Beta-lactam-resistance blaLCR 1	0.00097	0.00237	0	0	0	0	0	0	0	0
Beta-lactam-resistance blaMOX 1367 Branch	0	0	0	0	0	0.02141	0	0	0	0
Beta-lactam-resistance blaMOX 1368 Branch	0	0	0.00581	0.00523	0.00718	0	0	0	0	0
Beta-lactam-resistance blaMOX 1376 Branch	0.00649	0.00966	0	0.00547	0.0092	0	0	0	0	0
Beta-lactam-resistance blaMOX 6	0.00173	0	0	0	0	0	0	0	0	0
Beta-lactam-resistance blaMOX 8	0.00395	0	0	0	0.00314	0	0	0	0	0
Beta-lactam-resistance blaNPS	0.00573	0.00379	0.00368	0.00691	0.00567	0.00458	0	0	0	0
Beta-lactam-resistance blaOKP A 981 Branch	0	0.00079	0	0	0	0	0	0	0	0
Beta-lactam-resistance blaOKP B 1005 Branch	0	0	0	0	0	0	0	0	0.04061	0
Beta-lactam-resistance blaOXA 119	0.00196	0	0	0	0.00326	0	0.00539	0	0	0
Beta-lactam-resistance blaOXA 12	0.00332	0	0	0	0	0	0	0	0	0
Beta-lactam-resistance blaOXA 147	0.00581	0	0	0	0	0	0	0	0	0
Beta-lactam-resistance blaOXA 20	0	0	0	0	0.00321	0	0	0	0	0
Beta-lactam-resistance blaOXA 205	0.00289	0.00401	0.00562	0.00337	0.00433	0	0	0	0	0
Beta-lactam-resistance blaOXA 211	0	0	0	0	0	0.00991	0	0	0	0
Beta-lactam-resistance blaOXA 283 Branch	0	0	0	0	0	0	0.00602	0	0	0
Beta-lactam-resistance blaOXA 323 Branch	0.00632	0	0	0	0.00294	0	0	0	0	0
Beta-lactam-resistance blaOXA 326 Branch	0	0	0	0	0	0.00502	0	0	0	0
Beta-lactam-resistance blaOXA 333	0	0	0	0	0	0.00532	0	0	0	0
Beta-lactam-resistance blaOXA 347	0.00714	0	0	0.00347	0	0	0	0	0	0
Beta-lactam-resistance blaOXA 397 Branch	0	0	0	0	0.01384	0	0	0	0	0
Beta-lactam-resistance blaOXA 406 Branch	0.01516	0.01032	0.01263	0.01646	0.01182	0.011	0.02448	0	0	0
Beta-lactam-resistance blaOXA 413 Branch	0.04559	0.10403	0.03919	0.05075	0.05215	0.04064	0.04925	0	0	0
Beta-lactam-resistance blaOXA 415	0.02483	0.02441	0	0.04197	0.03559	0	0.01192	0	0	0
Beta-lactam-resistance blaOXA 464 Branch	0.0038	0	0	0	0	0	0	0	0	0
Beta-lactam-resistance blaOXA 470 Branch	0	0	0.06418	0	0	0.01927	0	0	0	0
Beta-lactam-resistance blaOXA 497 Branch	0	0.00496	0.00389	0	0.00494	0	0.00387	0	0	0
Beta-lactam-resistance blaOXA 5	0.15073	0.17631	0.16566	0.07504	0.10784	0.06785	0.12697	0	0	0
Beta-lactam-resistance blaOXA 522 Branch	0	0.00343	0.00464	0	0	0	0	0	0	0
Beta-lactam-resistance blaOXA 9	0.00734	0.00576	0.00263	0.00818	0	0	0.00457	0	0	0
Beta-lactam-resistance blaOXY 131 Branch	0	0	0	0	0	0	0.00199	0	0	0
Beta-lactam-resistance blaTLA 1	0.00585	0	0	0	0.00268	0	0.00203	0	0	0
Beta-lactam-resistance blaVEB 1653 Branch	0.00967	0	0	0.00762	0.00283	0	0.00413	0	0	0
Beta-lactam-resistance blaVEB 3	0.00746	0	0	0	0	0	0	0	0	0
Dihydrofolate-reductase dfrF	0.00573	0.00708	0	0	0.00658	0.00976	0.02229	0	0	0
Efflux-pump baeR	0	0	0	0	0.00487	0.00521	0.00442	0	0	0
Efflux-pump evgA	0	0.00173	0.00493	0	0	0.00485	0.00497	0	0	0
Efflux-pump msrE	0.04872	0.06441	0.05769	0.07587	0.07315	0.10434	0.11355	0	0	0
Fosfomycin fosA 2192 Branch	0	0.00263	0	0	0	0	0	0	0	0
H NS	0.00221	0.00283	0	0.00472	0	0	0.00765	0	0	0
Inactivates-14-membered-macrolides mphA	0.0079	0.01063	0.01033	0.01572	0.00935	0.01201	0.00386	0	0	0
Inner-membrane-transporter acrF	0.00295	0	0	0	0.00331	0	0.006	0	0	0
Integron-mediated-quinolone-resistance qnrVC1	0	0.00246	0	0.00807	0.00648	0.01169	0	0	0	0
Integron-mediated-quinolone-resistance qnrVC4	0.00581	0	0	0	0	0	0	0	0	0
Involved-in-polymyxin-resistance pmrA	0	0.00219	0	0	0	0	0	0	0	0
Involved-in-polymyxin-resistance pmrC	0.00284	0.00349	0.00378	0	0.00382	0	0.01006	0	0	0
Involved-in-polymyxin-resistance pmrE	0	0	0	0	0	0	0.00771	0	0	0
Involved-in-polymyxin-resistance pmrF	0.00481	0	0	0	0.00268	0.00495	0	0	0	0
MDR-Efflux-complex smeB	0	0	0	0	0	0	0	0	0.11621	0
MDR-Efflux-complex smeE	0	0	0	0	0	0	0	0	0.17758	0
MDR-Efflux-complex tolC	0	0.00354	0	0.00346	0.00314	0.0082	0.00694	0	0	0
MDR-Efflux-pump acrA	0	0.00183	0	0	0	0	0	0	0	0
MDR-Efflux-pump acrD	0	0.00267	0	0.00475	0.00388	0	0.00625	0	0	0
MDR-Efflux-pump emeA	0	0	0	0	0	0.00626	0	0	0	0
MDR-Efflux-pump marA	0.00424	0	0	0	0	0.0077	0	0	0	0
MDR-Efflux-pump mdtA	0	0	0.00374	0.00321	0.00292	0	0	0	0	0
MDR-Efflux-pump mdtB	0.00308	0	0	0	0	0	0	0	0	0
MDR-Efflux-pump mdtC	0.00244	0	0	0	0	0	0	0	0	0
MDR-Efflux-pump mdtD	0.00351	0	0	0	0.0052	0	0.00606	0	0	0
MDR-Efflux-pump mdtE	0.00482	0	0	0	0.0025	0	0	0	0	0
MDR-Efflux-pump mdtG	0	0	0	0	0.00266	0.00542	0.00345	0	0	0
MDR-Efflux-pump mdtN	0.00203	0	0	0	0	0.00439	0	0	0	0
MDR-Efflux-pump mdtO	0.00469	0	0	0	0.00224	0	0	0	0	0
MDR-Efflux-pump mdtP	0.00355	0	0	0.00323	0.00325	0	0	0	0	0
MDR-protein mdtH	0.00335	0	0.00417	0	0.00372	0	0	0	0	0
MDR-protein mdtL	0.00237	0	0	0.00375	0	0	0.00471	0	0	0
MDR-regulator gadX	0	0	0	0	0.0034	0	0.00646	0	0	0
MDR-translocase mdfA	0	0	0	0	0	0.00631	0	0	0	0
MDR-transporter emrD	0	0	0	0	0.00312	0	0	0	0	0
MDR-transporter emrY	0	0	0	0.00498	0	0.00599	0.00972	0	0	0
Macrolide ereA	0.0277	0.04336	0.04273	0.02466	0.02973	0.0165	0.01488	0	0	0
Macrolide erm 1960 Branch	0	0	0.0102	0	0.01207	0.01428	0	0	0	0
Macrolide erm40	0	0	0	0	0	0	0	1	0.14368	0.39062
Macrolide ermB	0.00335	0.00424	0	0.00456	0	0	0.00696	0	0	0
Macrolide ermF	0.00934	0.00438	0.00679	0.00608	0.00672	0.0067	0.00866	0	0	0
Macrolide ermG	0.00572	0	0	0	0.00246	0.00495	0.00479	0	0	0
Macrolide ermX	0	0	0	0	0	0	0.00563	0	0	0
Macrolide lnuB	0	0	0	0	0.00397	0	0	0	0	0
Macrolide lnuC	0.00598	0.00411	0.00565	0.00351	0.00601	0.0046	0.01256	0	0	0
Macrolide m 2021 Branch	0	0	0.01007	0	0	0	0	0	0	0
Macrolide mefA	0.00495	0.00281	0	0.00612	0.00809	0.01439	0.0167	0	0	0
Macrolide mefB	0.00453	0	0	0	0	0	0.00412	0	0	0
Macrolide mel	0.00342	0	0	0	0	0	0.01315	0	0	0
Macrolide mphE	0.01995	0.03008	0.02675	0.0317	0.03518	0.05397	0.05854	0	0	0
Macrolide msrD	0.00645	0.00287	0	0.00452	0.00482	0.01274	0.01869	0	0	0
Membrane-fusion-protein acrE	0.00391	0	0	0.00356	0.0032	0.00513	0	0	0	0
Membrane-fusion-protein emrA	0.00326	0	0	0.00361	0	0	0	0	0	0
Membrane-fusion-protein emrK	0.00559	0.00312	0	0	0.0027	0	0.01307	0	0	0
Penicillin-binding-protein PBP2b	0	0	0	0	0	0	0.00697	0	0	0
Phenicol catB3	0.00281	0	0	0	0	0	0	0	0	0
Phenicol catB4	0.01537	0.01556	0	0	0.02159	0.02481	0	0	0	0
Phenicol cmlA 2473 Branch	0	0.00881	0	0	0	0	0	0	0	0
Phenicol cmlA1	0.00212	0	0	0	0	0	0	0	0	0
Phenicol cmlA5	0.00328	0	0	0.00313	0.0026	0	0	0	0	0
Phenicol cmlA6	0	0	0	0	0	0	0.00278	0	0	0
Plasmid-mediated-quinolone-resistance qnrD1	0.00235	0	0	0	0	0	0	0	0	0
Quinolone 2089 Branch	0	0	0.00189	0	0	0	0.00302	0	0	0
Quinolone 2226 Branch	0	0	0.01617	0	0	0	0	0	0	0
Quinolone qnr 2071 Branch	0	0	0.0049	0	0	0	0	0	0	0
Quinolone qnrA1	0.00463	0	0	0.00871	0.00342	0	0	0	0	0
Quinolone qnrB 2227 Branch	0.00491	0.00621	0	0.00884	0.00472	0.0107	0	0	0	0
Quinolone qnrB 2347 Branch	0	0	0	0	0	0	0	0	0	0.21786
Quinolone qnrD 2253 Branch	0	0	0	0	0.00403	0.02282	0	0	0	0
Quinolone qnrS2	0.01656	0.01425	0.01204	0.02293	0.01491	0.02195	0.01423	0	0	0
Quinolone qnrVC 2207 Branch	0.00291	0	0	0	0	0	0	0	0	0
Regulator cpxR	0.00483	0	0.00601	0	0.00205	0	0.00612	0	0	0
Repressor-for-mdr-efflux-pump crp	0.00304	0	0	0	0	0	0.00715	0	0	0
Repressor-for-mdr-efflux-pump emrR	0.00184	0	0.00494	0	0	0	0.00515	0	0	0
Repressor-of-efflux-complex phoP	0	0	0	0	0	0	0.00333	0	0	0
Rifampicin arr 2454 Branch	0	0	0	0	0.00398	0	0	0	0	0
Sensor-kinase baeS	0.00354	0.00249	0	0	0.0036	0	0	0	0	0
Sensor-kinase cpxA	0.0023	0	0.00361	0	0.00242	0.00692	0.00556	0	0	0
Sensor-protein evgS	0.00412	0	0	0.00415	0	0.00609	0.01049	0	0	0
Sensor-protein phoQ	0	0	0	0	0	0	0.00691	0	0	0
Sulphonamide sul1	0.02665	0	0	0	0	0	0	0	0	0
Sulphonamide sul2	0.01266	0.00998	0.01657	0.016	0.01373	0.01603	0.00454	0	0.11365	0
Tetracycline tet 2374 Branch	0.00313	0	0	0.00312	0	0	0	0	0	0
Tetracycline tet 2531 Branch	0	0	0	0.00731	0	0.01002	0	0	0	0
Tetracycline tet 32	0.00223	0	0	0	0	0	0	0	0	0
Tetracycline tet 33	0.00155	0	0	0	0	0	0	0	0	0
Tetracycline tet 39	0.00879	0.00512	0.00689	0.00937	0.00428	0.02361	0.02533	0	0	0
Tetracycline tet32	0.00187	0	0	0	0	0	0	0	0	0
Tetracycline tet33	0.00143	0	0	0	0	0	0	0	0	0
Tetracycline tet40	0.00627	0.00263	0	0	0.00459	0	0.00779	0	0	0
Tetracycline tet44	0.00375	0	0	0	0	0	0	0	0	0
Tetracycline tetA	0.00501	0.00326	0	0	0	0	0	0	0	0
Tetracycline tetBP	0.00424	0	0	0.00449	0.00366	0	0	0	0	0
Tetracycline tetC	0.01129	0.00755	0.01161	0.01454	0.01126	0.01168	0	0	0	0
Tetracycline tetE	0.00318	0.00418	0.00554	0.00431	0.00572	0	0	0	0	0
Tetracycline tetG	0.003	0.00239	0	0.00663	0.0036	0	0	0	0	0
Tetracycline tetM	0	0	0	0	0	0	0.00489	0	0	0
Tetracycline tetO	0.00895	0.00701	0.01136	0.00903	0.00949	0.01222	0.02331	0	0	0
Tetracycline tetQ	0.01156	0.00786	0.00744	0.00581	0.0074	0.01384	0.0106	0	0	0
Tetracycline tetR	0.01005	0.00455	0	0.00753	0.00641	0.00416	0	0	0	0.15363
Tetracycline tetRG	0.00332	0.00307	0.00475	0.00466	0.00594	0	0	0	0	0
Tetracycline tetW	0.00635	0.00391	0.00518	0.00484	0.0056	0.00749	0.0105	0	0	0
Tetracycline tetX	0.00791	0.00567	0.00715	0.00878	0.0091	0.00723	0.00912	0	0	0
Translocase emrB	0.00493	0.00308	0	0.00488	0.00235	0	0	0	0	0
Transporter-for-efflux-complex mdtF	0.00256	0.00334	0	0	0.00308	0.00716	0.00592	0	0	0
Transporter-gene lsaE	0	0	0	0	0	0	0.00525	0	0	0
Trimethoprim dfr 2015 Branch	0	0	0	0	0.00578	0	0	0	0	0
Trimethoprim dfr32	0.00298	0.00218	0	0.00512	0	0	0.0038	0	0	0
Trimethoprim dfrA1	0.00255	0	0	0	0	0	0	0	0	0
Trimethoprim dfrA10	0	0	0	0.00252	0	0	0	0	0	0
Trimethoprim dfrA12	0.00187	0	0	0.00431	0.0024	0.01298	0	0	0	0
Trimethoprim dfrA14	0.00224	0.00285	0	0.0039	0.00356	0	0	0	0	0
Trimethoprim dfrA17	0.00213	0	0	0	0	0.00511	0	0	0	0
Trimethoprim dfrA5	0	0	0	0.00258	0	0	0	0	0	0
Trimethoprim dfrB4	0	0	0	0.00268	0	0	0	0	0	0
beta lactamase CblA 1	0.00252	0.00209	0	0	0	0	0	0	0	0
